1 **Research article**

2

3 **Detailed Analysis of Surface Infection Barrier on Hands: Relationship with**  
4 **Morbidity to Infection Diseases and Identification of Antimicrobial Components**

5

6 Yuki Nishioka<sup>a)</sup>, Kenichi Nagano<sup>b)</sup>, Yoshitaka Koga<sup>c)</sup>, Yasuhiro Okada<sup>a)</sup>, Ichiro Mori<sup>a)</sup>,  
7 Atsuko Hayase<sup>c)</sup>, Takuya Mori<sup>c)</sup>, Kenji Manabe<sup>a),\*</sup>

8

9 a) Personal Health Care Products Research, Kao Corporation, 2-1-3, Bunka,  
10 Sumida-ku, Tokyo 131-8501, Japan

11 b) Biological Science Laboratories, Kao Corporation, 2606 Akabane, Ichikai, Haga,  
12 Tochigi, 321-3497, Japan

13 c) Analytical Science Laboratories, Kao Corporation, 2606 Akabane, Ichikai, Haga,  
14 Tochigi, 321-3497, Japan

15

16 **\*Correspondence :**

17 E-mail : [manabe.kenji@kao.com](mailto:manabe.kenji@kao.com)

18 Address: Kao Corporation, 2-1-3, Bunka, Sumida-ku, Tokyo 131-8501, Japan

19 Phone: +81-70-4356-2711

20

21 **Running title:** Identification of antimicrobial components on hands

22 **Abstract**

23 Although the surface of hands in humans is known to harbor high levels of  
24 antimicrobial activity, reports investigating the relationship between antimicrobial  
25 activity and morbidity in infectious diseases are lacking. Additionally, the precise  
26 components involved in this activity are not known. Therefore, in this study, a method  
27 was developed to quantitatively measure the antimicrobial activity of the components  
28 found on the surface of hands, which was then compared with the medical history of the  
29 participants for infectious diseases. As a result, the antimicrobial activity of the surface  
30 of the hands was found to be positively associated with the history of infection in  
31 individuals. Furthermore, a comprehensive analysis of the components on the surface of  
32 hands indicated that organic acids and antimicrobial peptides are highly correlated with  
33 antimicrobial activity. The high amounts of lactic acid found on the surface of hands  
34 suggested it is an important factor in the hand surface infection barrier. Here we showed  
35 that the application of lactic acid within the range of the amounts present on the hand  
36 surface was found to significantly improve the antimicrobial activity of the hands.  
37 Taken together, these results demonstrate that this new method can be used to quantify  
38 antimicrobial activity, which opens new avenues for the development of hand hygiene  
39 practices by enhancing the antimicrobial activity on the surface of hands using natural

40 ingredients against pathogens.

41 **Keywords:** contact infection, antimicrobial activity, hand surface, lactic acid, infectious

42 disease, hand hygiene

43 **1. Introduction**

44 Contact infection is an important route in the transmission of pathogens. Pathogens  
45 from one infected person can be transmitted either by direct contact with another person  
46 or through surfaces. Thus, contact is a major infection route for many diseases and  
47 requires control to prevent infection. Hand-washing with soap or the use of hand  
48 sanitizers with alcohol are common hand hygiene practices. In particular, the preventive  
49 effect of hand-washing on infectious diseases has been strongly demonstrated  
50 epidemiologically [1].

51 However, existing hand hygiene practices are unable to fully prevent contact  
52 infections, due to both the high frequency of self-inoculation and the high stability of  
53 pathogens in the environment. Regarding self-inoculation, Kwok et al. found that  
54 medical students at university touched their face an average of 23 times per hour, among  
55 which 44% came into contact with mucous membranes, such as the mouth, eyes, and  
56 nose [2]. Furthermore, in a recent survey of Iranian citizens in public places, non-mask  
57 wearers (N = 432) touched the mucous membranes of the face an average of 11 times an  
58 hour [3]. These results suggest that humans touch the mucous membranes of the face  
59 once every 5 min. Regarding the stability of pathogens, influenza virus, for example,  
60 has been reported to survive for approximately 2-8 h when normal droplets adhere to

61 environmental surfaces [4]. In addition, the coronavirus SARS-CoV-2, which is now  
62 widespread and causing a pandemic, is even more stable than influenza and has been  
63 found to be viable for up to 72 h on environmental surfaces [5]. Therefore, it is highly  
64 possible that the virus excreted from the infected person remains on contact surfaces for  
65 a long period of time, whereby infection is caused by the frequent repetition of  
66 unknowingly touching infected surfaces and the face. In particular, in recent decades,  
67 the risk of infection by invisible pathogens has increased due to the dramatic increase in  
68 population densities and the development of transportation networks, and concerns  
69 regarding the occurrence and spread of clusters of infection, due to the unconscious and  
70 frequent transfer of pathogens from the environment to the mucous membranes of the  
71 face, are increasing.

72 In a meta-analysis of intervention clinical trials of hand hygiene, White et al. reported  
73 that non-alcoholic hand sanitizers using benzalkonium chloride, an antimicrobial agent,  
74 have a higher preventive effect on respiratory diseases than alcoholic hand sanitizers [6].  
75 The viral carrier for respiratory diseases is droplets, which are more difficult to observe  
76 visually. Therefore, it is expected that unconscious self-inoculation is likely to occur in  
77 many places. The target of this survey was elementary school students, who often have  
78 a low hygiene awareness. Under these conditions, leave-on hand hygiene products with

79 benzalkonium chloride are more likely to have a higher effectiveness for the prevention  
80 of infection compared to volatile alcohol hand sanitizers.

81 Hand hygiene is a common practice in daily life, wherein the excessive use of  
82 antimicrobial agents poses a risk to the development of resistant bacteria, as well taking  
83 its toll on the skin [7]. Since humans have evolved while coexisting with bacteria and  
84 viruses, it is inferred that the hands, which are closely related to infection in daily life,  
85 acquired antimicrobial ability in the process. In fact, previous studies have found that  
86 the surface of human hands has high levels of antimicrobial activity. For example,  
87 applying *E. coli* to the hands of healthy adults was found to reduce the number of  
88 bacteria by about 3 orders in 30 min [8]. Additionally, it has also been reported that the  
89 number of influenza viruses transferred to the hands decreases by 2 orders after about 5  
90 minutes [4]. These results indicate that hands have a strong surface infection barrier,  
91 which effectively reduces bacteria and viruses, compared to other environmental  
92 surfaces. It also suggests that the identification of molecules involved in the inherent  
93 antimicrobial ability of the skin could promote the development of new natural  
94 antimicrobial agents with fewer side effects.

95 Several publications have proposed that the skin infection barrier involves peptides  
96 that exert antimicrobial activity and initiate the host response, resulting in the release of

97 cytokines, inflammation, angiogenesis, and re-epithelialization [9]. Other components  
98 present on the skin, such as lipids and organic acids, may also exhibit antibacterial  
99 properties, however, their contribution to endogenous defenses remains poorly  
100 understood [10]. In addition, studies investigating the effects of the activity of the hand  
101 surface infection barrier on the morbidity of infectious diseases are lacking.

102 In this study, we developed a method to evaluate the inherent antimicrobial activity of  
103 the skin in combination with the quantification of organic acids, amino acids, proteins,  
104 and lipids present on the surface of hands to identify the crucial components of this  
105 barrier. Our results showed that this new method enables the precise quantification of  
106 the antimicrobial activity of the skin on the hands, which was used to successfully  
107 identify lactic acid as a crucial component of the hand surface infection barrier.

108

## 109 **2. Material & Methods**

### 110 **2.1 Bacterial strains and culture medium**

111 *Escherichia coli* NBRC3301 strain (NBRC, National Institute of Technology and  
112 Evaluation Biological Resource Center) and *Staphylococcus aureus* NBRC13276 strain  
113 (NBRC) were used. As a pre-culture, a single colony was grown on Soybean Casein  
114 Digest (SCD) agar medium (Nihon Pharmaceutical. Co., Ltd), and then inoculated into



115 4 mL of Luria-Bertani (LB) liquid medium (Nihon Pharmaceutical. Co., Ltd) and  
116 cultured overnight (37°C, 180 rpm). Next, 1% of the obtained culture solution was  
117 inoculated into LB liquid medium, cultured for 15 h, washed twice with sterile water,  
118 and stored on ice.

119

## 120 **2.2. Measurement of viable bacterial counts by culture method using a plate reader**

121 The viable bacterial counts were measured by monitoring growth using a Bio  
122 Microplate Reader HiTS (Sinic Corporation). A dilution series was prepared from the  
123 sample, and the bacterial numbers were measured by plating on SCD agar medium and  
124 incubating for 18 h at 37°C . Then, both the sample and the dilution series were  
125 shake-cultured at 37°C. The absorbance (OD<sub>600</sub>) was measured every 15 min to create a  
126 growth curve. Based on the resulting growth curve, the time required to reach OD<sub>600</sub> =  
127 0.02, which is the middle stage of the logarithmic growth phase, was obtained, and the  
128 number of viable bacteria in the sample was calculated using the calibration curve  
129 obtained from the dilution series.

130

## 131 **2.3. Viral strain, cells, and culture medium**

132 Influenza virus A/Memphis/1/71 (H3N2) was cultured and propagated in serum-free

133 medium (SFM) (Thermo Fisher Scientific). The virus was purified by centrifugation  
134 after proliferation using Madin-Darby Canine Kidney (MDCK) cells (ATCC CCL-34).  
135 As the cells to be infected, MDCK-II cells passaged to subconfluent on a 96-well plate  
136 were used.

137

#### 138 **2.4. Antiviral evaluation method**

139 A sample containing the virus was added to MDCK cells cultured on a 96-well plate.  
140 The cells were infected with the virus by incubating for 15 min at 37°C and 5% CO<sub>2</sub>.  
141 Then, the solution was sucked using an ejector and washed twice with phosphate  
142 buffered saline (PBS) (FUJIFILM Wako Pure Chemical Co.) at 100 µL/well. These  
143 cells were incubated at 37°C under 5% CO<sub>2</sub> in SFM (100 µL/well) for 14 h, and the  
144 amount of propagated virus was calculated from the neuraminidase activity in the  
145 supernatant. Next, 20 µL of 250 µM 4-Methylumbelliferyl N-Acetyl- $\alpha$ -D-Neuraminic  
146 Acid (Funakoshi Co.) was added to 30 µL of supernatant and incubated at 37°C for 30  
147 min. The reaction was terminated by the addition of 200 µL of 100 mM sodium  
148 carbonate buffer, and the fluorescence value was measured using a plate reader (Ex: 355  
149 nm/Em: 460 nm, gain: 70) (TECAN M200). The number of viruses in the reaction  
150 solution was calculated from a calibration curve obtained from the dilution series of the

151 virus solution measured using the same procedure. It has been confirmed that Dimethyl  
152 Sulfoxide (DMSO) has no effect on the influenza virus and MDCK-II cells under the  
153 dilution conditions used in this study.

154

155 **2.5. *In vivo* qualitative and quantitative evaluation of surface infection barrier on**  
156 **hands**

157 The antimicrobial activity was measured using a hand stamp for qualitative evaluation  
158 and a liquid cultivation method using a plate reader for quantitative evaluation. For  
159 qualitative evaluation, *E. coli* solution (200 mL) with an optical density (OD) = 0.1 was  
160 placed in a 500 mL vat. Both hands were soaked for 5 s and the left hand was dried for 3  
161 min. Residual bacteria were qualitatively observed by placing the hand on a hand petri  
162 dish (Nissui Pharmaceutical Co., Ltd.) containing X-Gal agar medium (Nissui  
163 Pharmaceutical Co., Ltd.) for 10 s (loading about 2 kg) and culturing in a 37°C  
164 incubator for 15 h. The other hand was stamped after drying for 30 s as a control. For  
165 quantitative evaluation, 10 µL of cultured *E. coli* solution (OD = 1.0) was applied to 4  
166 cm<sup>2</sup> on the palm of the hand, and was collected 3 min later using a swab (BD-BBL  
167 culture swab EZ; Becton Dickinson) soaked in physiological saline. Collection by  
168 swabbing was performed twice and then incubated in 1 mL of Lecithin and polysorbate

169 80 (LP) medium (FUJIFILM Wako Pure Chemical Co.). One hundred microliters of this  
170 sample were mixed with 100  $\mu$ L of 2 $\times$  SCD medium (Nihon Pharmaceutical Co., Ltd.)  
171 and cultivated in a 96-well microplate in a 37°C incubator for 24 h. Quantification was  
172 performed using a microplate reader (Bio Microplate Reader HiTS; Sinic Corporation),  
173 and the antimicrobial effect was evaluated by calculating the number of surviving  
174 bacteria relative to the initial viable bacterial number.

175

## 176 **2.6. *In vitro* antimicrobial activity evaluation of hand surface components**

177 The extraction and preparation of the hand components are shown below. A 2.5  $\times$  5 cm  
178 region of the hand was rubbed 8 times with a swab 1K1501 (J.C.B. Industry Co.)  
179 soaked in 50% ethanol. This procedure was repeated 3 times on the same region for all  
180 subjects. Then, the swab tips were cut off, placed in a microtube, and 600  $\mu$ L of 50%  
181 ethanol was added. The samples were then sonicated for 5 min using an ultrasonic  
182 cleaner SW5800 (CITIZEN Watch Co.) and pooled into one microtube (a total of 1800  
183  $\mu$ L per subject). After centrifugation at 15,000 rpm for 5 min, the supernatant was split  
184 in 2 to evaluate the antibacterial and antiviral activity. Then, the samples were dried  
185 using a centrifugal evaporator CVE-3000 (TOKYO RIKAKIKAI CO, LTD), dissolved  
186 in 10  $\mu$ L of dimethyl sulfoxide (DMSO) (FUJIFILM Wako Pure Chemical Co.), and

187 stored at -20°C. For antimicrobial activity, an undiluted solution of surface components  
188 on hands was used against *E. coli*, and an 8-fold diluted sample with PBS was used  
189 against *S. aureus*. The sample and the bacterial solution (OD<sub>600</sub> = 1.0) were mixed in  
190 equal amounts and reacted at 37°C for 1 h. Quenching was performed by adding 135 µL  
191 of Lecithin and Polysorbate 80 (LP) diluent to 15 µL of the reaction solution, and then  
192 standing it on ice. Next, 100 µL of this sample was mixed with 100 µL of 2 x SCD  
193 medium and cultivated in a 96-well microplate in a 37°C incubator for 24 h, before  
194 performing quantification on a microplate reader (Bio Microplate Reader HiTS; Sinic  
195 Corporation). The antimicrobial effect was evaluated by calculating the number of  
196 surviving bacteria relative to the initial viable bacterial number. For antiviral evaluation,  
197 surface components extracted from the hand were diluted 100-fold with PBS and 100  
198 µL were incubated with 100 µL of virus solution ( $8.0 \times 10^4$  pfu/mL) at 37°C for 30 min.  
199 After the reaction, 100 µL of serum free medium (SFM) at a double concentration was  
200 added and placed on ice for quenching. The antiviral effect was calculated from the  
201 relative fluorescence values.

202

## 203 **2.7. Blood sample collection and measurement of natural killer cell activity**

204 Blood samples were collected in heparinized tubes with a lymphocyte preservation

205 solution (Nipro Co.). Peripheral blood molecular cells (PBMCs) were isolated by  
206 density gradient centrifugation using Isolymp (CTL Scientific Supply Co.), according  
207 to the manufacturer's instructions. The natural killer (NK) cell activity of the PBMCs  
208 was determined using the chromium-51 ( $^{51}\text{Cr}$ ) release method, as previously described  
209 [11]. Briefly, PBMCs isolated as effector cells and K-562 tumor cells labeled with  $^{51}\text{Cr}$   
210 as target cells were incubated at a ratio of 1:50 for 4 h at 37°C. Then, the  $^{51}\text{Cr}$  released  
211 in the supernatant was measured with a  $\gamma$ -counter (ARC-370M, Aloka). The maximum  
212  $^{51}\text{Cr}$  release was ensured by adding 1 N hydrochloric acid, and the minimum  $^{51}\text{Cr}$   
213 release was confirmed by adding only complete medium to the target cells. NK cell  
214 activity was expressed as the percentage cytotoxicity, calculated using the following  
215 formula:

216 
$$\text{NK cell activity} = [(\text{experiment cpm} - \text{minimum cpm}) / (\text{maximum cpm} - \text{minimum cpm})] \times 100.$$

218

## 219 **2.8. Saliva sample collection**

220 Saliva samples were collected in a quiet room in the morning between 9:00 and 10:00,  
221 at least 60 min after eating. The participants were instructed to accumulate saliva in  
222 their mouths and spit it into a sterile plastic tube at the desired time. Saliva samples

223 were collected for 10 min. The saliva volume (g) was calculated by subtracting the  
224 weight of the empty tube from the collected tube.

225

## 226 **2.9. Measurement of oral mucosal moisture**

227 The oral mucosal moisture was measured using an oral moisture-checking device  
228 (Mucus, Life Co.), performed according to the manufacturer's instructions. Briefly, the  
229 sensor surface of the device was placed in vertical contact with the lingual mucosa, and  
230 the pressure of the sensor was controlled to approximately 200 mg. During the  
231 measurement, the participants were instructed to put their tongue out. The  
232 measurements were conducted three times, and the mean value was calculated.

233

## 234 **2.10. Measurement of nasal mucociliary clearance**

235 The nasal mucociliary clearance time was evaluated using the saccharine test, as  
236 previously described [10]. A tablet was placed in the nasal cavity of the participants,  
237 who were instructed to settle into a comfortable sitting position and not sneeze, cough,  
238 sniffle, blow their nose, talk, or take deep breaths during the test [12]. The time taken  
239 from the placement of the tablet to the perception of sweet taste was recorded as the  
240 nasal mucociliary clearance time.

241

## 242 **2.11. Sample collection method for hand surface component analysis**

243 For the collection of water-soluble components, 9 sheets of  $\phi$ 2.1 cm filter paper (AS  
244 ONE Co.) were attached to the palm of the left hand for 5 min, and 60  $\mu$ L of ultrapure  
245 water was added dropwise to each filter paper. The filter paper was divided into 3 sheets  
246 (for low-molecular-weight compounds) and 6 sheets (for antimicrobial peptides), and  
247 each was collected in a screw tube. For lipid collection on the skin surface, a 5  $\times$  5 cm  
248 area of the left palm was scraped with a swab soaked in ethanol (three times from the  
249 same site) and collected into a screw tube.

250

### 251 **2.11.1. Analysis of low molecular weight water soluble components on the skin** 252 **surface**

253 Three filter papers sampled from the hand surface were dried by spraying with nitrogen.  
254 Subsequently, ultrapure water was added, and the supernatant was subjected to liquid  
255 chromatography mass spectrometry. An AQUITY LC system (Waters) equipped with  
256 LTQ Orbitrap Velos Pro (Thermo Fisher Scientific) was used, and samples were  
257 separated using a Discovery HS F5 column (3  $\mu$ m beads, 2.1 mm i.d., 150 mm long)  
258 (Sigma-Aldrich) at 0.2 mL/min. The elution buffer was composed of buffer A (0.1%



259 formic acid) and buffer B (acetonitrile containing 0.1% formic acid). The mobile phases  
260 were programmed consecutively, as follows: an isocratic elution of A 95% (B 5%)  
261 between 0 and 5 min, a linear gradient of A 95-0% (B 5-100%) between 5 and 20 min,  
262 an isocratic elution of A 0% (B 100%) between 20 and 25, and an isocratic elution of A  
263 95% (B 5%) from 25.1 to 40 min for column equilibrium. The scan measurements were  
264 performed in positive and negative ion mode.

265

#### 266 **2.11.2. Analysis of water-soluble proteins on the skin surface**

267 The identification of superficial water-soluble proteins was carried out as previously  
268 described [13]. Briefly, protein extracts from 6 filter papers were dissolved in MPEX  
269 PTS Reagents (GL Sciences) containing 7 M urea and 2 M thiourea. Then, 1/100  
270 amount of 50 mM ammonium bicarbonate ( $\text{NH}_4\text{HCO}_3$ ) buffer containing 1 M  
271 dithiothreitol was added to the sample solution, and the mixture was incubated for 16 h  
272 at 35°C. Subsequently, 1/20 amount of 50 mM  $\text{NH}_4\text{HCO}_3$  buffer containing 1 M  
273 iodoacetamide was added to the sample solution, and the mixture was incubated for 30  
274 min at room temperature. The amount of protein was quantified using the EZQ protein  
275 assay kit (Thermo Fisher Scientific). The solution was diluted 3 times with 50 mM  
276  $\text{NH}_4\text{HCO}_3$  before degrading using lysyl endopeptidase (FUJIFILM Wako Pure

277 Chemical Co.) and trypsin (FUJIFILM Wako Pure Chemical Co.). The amount of lysyl  
278 endopeptidase and trypsin was 1/100 of the amount of protein in each sample. Then,  
279 ethyl acetate and trifluoroacetic acid (0.5% of final concentration) were added to the  
280 mixture. Then, after centrifugation at  $15,700 \times g$  for 2 min, the supernatant was  
281 removed and dried under reduced pressure at 50°C to obtain a pellet. The resulting  
282 pellet was dissolved in water containing 0.1% trifluoroacetic acid and 5% acetonitrile  
283 and applied to the GL-Tip SDB column (GL Sciences, Tokyo). After washing once with  
284 water containing 0.1% trifluoroacetic acid and 5% acetonitrile, it was eluted with 80%  
285 acetonitrile containing 0.1% trifluoroacetic acid. The eluate was dried under reduced  
286 pressure at 35°C, dissolved in water containing 0.1% formic acid and 2% acetonitrile,  
287 and subjected to liquid chromatography tandem-mass spectrometry. The samples were  
288 concentrated with Acclaim PepMap 100 C18 Nano-TrapColumn (3  $\mu\text{m}$  beads, 75  $\mu\text{m}$  id,  
289 20 mm long; Thermo Fisher Scientific) and separated using a nanoACQUITY BEH130  
290 C18 (1.7  $\mu\text{m}$  beads, 100  $\mu\text{m}$  id, 100 mm long; Waters). Proteins were identified by  
291 cross-referencing the obtained spectrum with the Swiss-Prot protein sequence database.  
292 The concentration of the identified protein was estimated using the empAI method [14].

293

### 294 **2.11.3. Analysis of lipids on the skin surface**

295 Superficial lipids were quantified as previously described [15]. After immersing a  
296 cotton swab with scraped hands in chloroform/methanol (1/1 solution), the supernatant  
297 was collected and internal standard substances (TAG-C39: 0: tritridecanoin, DAG-C26:  
298 0: ditridecanoin, FFA-C12: 0- d3: lauric acid (Methyl-d3), WE-C28: 1: lauryl  
299 palmitoleate, ChE-C10: 0: cholesteryl caprate, ChE-C2: 0:cholesteryl acetate) were  
300 added to samples that were then subjected to liquid chromatography tandem-mass  
301 spectrometry. An Agilent 1200 series LC system equipped with an Agilent 6460 set ESI  
302 source was used. Chloroform/methanol (50:50, v/v) containing 15 mmol/L ammonium  
303 acetate was used as the mobile phase and analyzed at a flow rate of 0.2 mL.  
304 Quantification was performed using the internal standard method. For the quantification  
305 of compounds of different types and chain lengths, differences in intermolecular  
306 sensitivity were as corrected from the relative molar sensitivity with the internal  
307 standard substance, and the absolute quantification value was calculated.

308

## 309 **2.12. Study design**

310 The following four surveys were conducted regarding the surface infection barrier of the  
311 hand: (1) a preliminary study to understand the antimicrobial activity of hands using *in*  
312 *vivo* and *in vitro* methods; (2) a retrospective study investigating the relationship

313 between antimicrobial activity of hand and morbidity to infection; (3) the identification  
314 of antimicrobial components on hands using comprehensive analysis; (4) the  
315 verification of the effect of lactic acid application.

316

317 **2.12.1. A preliminary study to understand the antimicrobial activity of hands using**  
318 ***in vivo* and *in vitro* methods**

319 This study was conducted as a pilot study, and volunteers were recruited randomly. The  
320 subjects were healthy adult men and women (aged 25 to 49 years). The participants  
321 performed standard hand washing with test soap formulated with alkyl ether carboxylic  
322 acid, sodium salt (AEC), alkyl ether sulfate (AES), and alkyl glucoside (AG) without  
323 antimicrobial compounds [16], rinsed with tap water for 30 seconds, and then washed  
324 using purified water for 10 seconds. To avoid contact with the evaluation site, they wore  
325 polyethylene gloves (AS ONE Co.) for 2 h of acclimation. Subsequently, the qualitative  
326 and quantitative evaluation of the antimicrobial ability of the hand was performed  
327 according to the method described separately.

328

329 **2.12.2. A retrospective study investigating the relationship between the**  
330 **antimicrobial activity of hands and morbidity to infection**

331 The relationship between the antimicrobial activity of hands, other physiological  
332 functions known to act against infectious diseases (saliva volume, oral mucosal  
333 moisture, NK cell activity in PBMCs, and nasal mucociliary clearance), and morbidity  
334 to infection was investigated in a retrospective study. This survey was conducted in June  
335 2018. Thirty-eight healthy men and 71 women between the ages of 20 and 49 years who  
336 lived with children under elementary school age were recruited. Based on the responses  
337 to questionnaires on infectious diseases (Table S1), we constructed 2 groups: (1) a “high  
338 morbidity” group, comprised of 55 subjects; (2) a “low morbidity” group, comprised of  
339 54 subjects (Table S1). The restrictions on the subjects were as follows: (1) avoid  
340 excessive drinking, eating, and strenuous exercise the day before the test; (2) smoking is  
341 prohibited on the day of the test until the end of the test; (3) have breakfast and brush  
342 teeth for at least 1 hour before starting the test; (4) only drink water from 1 hour before  
343 starting the test; (5) avoiding washing hands during the test.

344 In addition to measuring the biological parameters, a lifestyle-related questionnaire  
345 was also provided (Table S2). Statistical analysis was performed using the Statistical  
346 Package for the Social Sciences (SPSS) software for Windows. The data were first  
347 tested for normality using the Shapiro–Wilk test. Data showing normality were assessed  
348 for variability using an f-test and t-test, in accordance with variability (body temperature,

349 NK cell activity in PBMCs, and nasal mucociliary clearance). Data that did not show  
350 normality were tested using the Mann-Whitney U test (saliva volume, oral mucosa  
351 moisture, and antimicrobial activity of hand for *E. coli* and *S. aureus*). In addition, we  
352 performed decision tree analysis to assess the biological parameters (age, sex, and body  
353 temperature) and physiological functions (antimicrobial activity of hand, saliva volume,  
354 oral mucosal moisture, NK cell activity in PBMCs, and nasal mucociliary clearance)  
355 associated with morbidity to infection. In this analysis, we start with a core node  
356 consisting of the entire sample, and then recursively partition each node into two child  
357 nodes to create a tree-like structure. Odds ratios (ORs) and 95% confidence intervals  
358 (CIs) were obtained using the cross-tabulation method.

359

### 360 **2.12.3. Identification of antimicrobial components on hands using comprehensive** 361 **analysis**

362 The participants were 27 healthy men and 27 women aged 20 to 49 years, resulting in a  
363 total of 54 subjects. The test was conducted in January 2018. Subjects performed  
364 standard hand washing with test soap formulated with AEC, AES, and AG without  
365 antimicrobial compounds [16], rinsed with tap water for 30 seconds, and then washed  
366 using purified water for 10 seconds. To avoid contact with the evaluation site, they wore

367 polyethylene gloves (0950; SHOWA GLOVE Co.) for 2 h of acclimation (20°C, 40%  
368 humidity). The hand components were collected at the sites shown in Figure S1. The  
369 correlation coefficient between each compound and antimicrobial activity was  
370 calculated using the corr.test function in R.

371

372 **2.12.4. Verification of the effect of lactic acid application on the antimicrobial**  
373 **activity of hands**

374 A test site of 2 × 2 cm on the palm of the subjects' hands was used. After hand washing,  
375 as described above, 10 µL of 0.2, 1.0, 5.0, 10, and 23.5 g/L lactic acid aqueous solution  
376 (FUJIFILM Wako Pure Chemical Corporation) was added dropwise to the test site,  
377 spread over 30 s using a 0.2 mL round tube (AS ONE Co.), and dried for 5 min. During  
378 this process, 5.6, 27.8, 138.8, 277.5, and 652.5 nmoL/cm<sup>2</sup> of lactic acid remained on the  
379 hands, respectively. Next, 10 µL of the bacterial solution (*E. coli*, OD = 1) was added  
380 dropwise to the test site, spread for 30 s using a 0.2 mL round tube, and dried for 3 min.  
381 The test site was scraped with a swab immersed in LP-PBS containing PBS with LP  
382 solution to collect the residual bacteria. Collection by swabbing was performed twice  
383 and suspended in 1 mL of LP-PBS solution. Then, 100 µL of this sample was mixed  
384 with 100 µL of 2× SCD medium (Nihon Pharmaceutical Co.) and cultivated in a

385 96-well microplate in a 37°C incubator for 24 hours, followed by quantification on a  
386 microplate reader (Bio Microplate Reader HiTS; Sinic Corporation). To determine if the  
387 effect of lactic acid is mediated by pH, we used aqueous hydrochloric acid (HCl)  
388 solution (Kanto Chemical Co., Inc.), in which the pH was adjusted to the same value of  
389 lactic acid as the control.

390

### 391 **3. Results**

#### 392 **3.1. Preliminary study to characterize the antimicrobial activity of hands using *in*** 393 ***vivo* and *in vitro* methods**

394 As a first pilot study, we examined various methods for measuring the antimicrobial  
395 activity found on hands. After immersing the hands of our subjects in an *E. coli*  
396 suspension, the palms were allowed to air-dry for 30 s or 3 min before being pressed  
397 against agar medium, which was cultured overnight (Figure 1A). Blue colonies  
398 indicated where *E. coli* was degrading X-gal in the medium. No blue colonies were  
399 observed in the imprints of hands not immersed in *E. coli* solution, suggesting that the  
400 microorganisms that formed the blue colonies were not found in the normal skin  
401 microbiota (data not shown). As shown in Figure 1A, regarding subject (a), the number  
402 of bacteria decreased remarkably in 3 min compared to the control (30 s), indicating the



403 ability of the human hand to inactivate *E. coli* over time. On the other hand, regarding  
404 subject (b), no significant difference was observed between 30 s (control) and 3 min,  
405 indicating that there are individual differences in the antimicrobial ability of hands. In  
406 addition, the phenomenon of *E. coli* inactivation observed in subject (a) was not  
407 observed immediately after washing hands, suggesting that the components existing on  
408 the surface of the hands are a contributing factor (Figure S2).

409 To further evaluate the antimicrobial activity of compounds on the surface of the  
410 hands, we developed a quantitative method by collecting these components and testing  
411 their effects on bacterial or viral proliferation *in vitro*. The samples were collected using  
412 a swab and extracted with 50% ethanol and dried before being concentrated to 0.8  
413  $\mu\text{L}/\text{cm}^2$  with DMSO. Figure 1B shows the correlation of the log reduction rate against *E.*  
414 *coli in vivo* method and the *in vitro* method for 7 participants, indicating a positive  
415 correlation ( $r = 0.66$  and  $P = 0.1$ ; Pearson correlation test). This result suggests that the  
416 components found on the surface of hands are important factors in defining the hand  
417 surface infection barrier. Furthermore, these findings indicate that this *in vitro* method is  
418 appropriate to evaluate the function of this infection barrier. Figure 1C shows the  
419 antimicrobial activity of the hand surface components of 6 participants against *E. coli*  
420 and *S. aureus*, as well as the antiviral activity against influenza A virus. For this,

421 undiluted, 8-fold diluted, and 100-fold diluted solutions of extracted samples against *E.*  
422 *coli*, *S. aureus*, and influenza A virus were used. As a result, positive correlations ( $r =$   
423  $0.970$  and  $P = 0.001$  (*E. coli* vs. *S. aureus*),  $r = 0.667$  and  $P = 0.147$  (*E. coli* vs.  
424 influenza A virus), and  $r = 0.662$  and  $P = 0.152$  (*S. aureus* vs. influenza A virus)) were  
425 observed, using the Pearson correlation test. These results suggest that the components  
426 found on the surface of hands could act on a wide range of microbial species. However,  
427 taking into account the differences in the dilution rate, the susceptibility of the hand  
428 surface components was around one order lower against *E. coli* than against *S. aureus*  
429 and influenza virus.

430

### 431 **3.2. Relationship between antimicrobial activity on the surface of hands and** 432 **morbidity to infection**

433 Next, in order to assess the influence of the antimicrobial activity of hands on morbidity  
434 to infection, subjects with similar lifestyles (Table S2), corresponding to the low and  
435 high morbidity group (Table S1), were recruited and various physiological functions  
436 known to act against infectious diseases (mentioned in the Materials and Methods  
437 section) were measured, including the antimicrobial activity of the surface of hands.  
438 Figure 2 shows the antimicrobial activity of the hand surface components of each group

439 against *E. coli* (Fig. 2A) and *S. aureus* (Fig. 2B). The antimicrobial activity against *E.*  
440 *coli* was significantly lower in the high morbidity group than in the low morbidity group  
441 (median of low morbidity group: 0.466; median of high morbidity group: 0.159;  $P =$   
442 0.001). Similar results were observed in the antimicrobial activity against *S. aureus*  
443 (median of low morbidity group: 1.137; median of high morbidity group: 0.191;  $P <$   
444 0.001). In addition, our study showed that not only the antimicrobial activity on hands,  
445 but also oral mucosal moisture, was associated with infection prevalence ( $P = 0.006$ )  
446 (Table 1). On the other hand, there was no difference between the groups in terms of  
447 their NK cell activity and saliva volume (Table 1). These results are not related to  
448 hygiene behaviors, such as hand hygiene, mask, and vaccination frequency, since the  
449 frequency of these behaviors was higher in the high morbidity group than in the low  
450 morbidity group (Table S2).

451 To evaluate the importance of parameters associated with infectious disease  
452 morbidity, we performed a hierarchical decision tree analysis, containing all the  
453 measured biological parameters (Figure 3). The tree comprised a total of eight nodes  
454 and five terminal nodes (nodes that have no child nodes). The antimicrobial activity of  
455 the hand (*E. coli*) was identified as the main contributing factor for morbidity to  
456 infection. The odds ratio based on the reference value (log reduction value for *E. coli*:

457 0.154) calculated by the decision tree analysis was 7.2 times (95% CI, 2.64-19.50). For  
458 subjects with a log reduction value for *E. coli* of 0.154 or higher, the OR based on the  
459 reference value of mucosal moisture was 5.7 times (95% CI, 2.08-15.60). With regards  
460 to age, cross-tabulation based on 41 and 38 years of age showed that the results were  
461 significant with respect to 41 years of age. However, the 95% CI ranged from 0.01-1.08,  
462 indicating that the reliability of the results was low. These results are shown in detail in  
463 Table S3.

464

### 465 **3.3. Identification of antimicrobial components on hands using comprehensive** 466 **analysis**

467 Additionally, we conducted another clinical study to identify the factors involved in the  
468 antimicrobial activity of hands. In this survey, we analyzed the components of the  
469 surface of the hands and calculated their correlation with antimicrobial activity against  
470 *E. coli*, *S. aureus*, and influenza A virus. The components analyzed were organic acids,  
471 amino acids, lipids, and some antimicrobial proteins (Table 2). First, in terms of the  
472 amounts found on the hand surface, lactic acid was prominently present among all  
473 compounds (Table 2). Next, we analyzed the correlation between antimicrobial activity  
474 and surface components using Holm-corrected Pearson correlation coefficients, as

475 shown in Table 2. Bold numbers denote statistically significant data ( $P < 0.05$ ), while  
476 compounds in bold indicate compounds that were significantly correlated with all  
477 antimicrobial activities. Regarding organic acids, lactic acid was found to have a  
478 significant correlation with all microbial species (Table 2, Figure S3). In addition to  
479 lactic acid, malic acid, 2-hydroxybutyric acid, citric acid, ascorbic acid, azelaic acid,  
480 2-oxoglutarate, suberic acid, and fumaric acid showed a high positive correlation with  
481 antimicrobial activities. In the amino acid group, alanine, creatinine, taurine, choline,  
482 creatine, and p-aminobenzoic acid were confirmed as components with high levels of  
483 correlation. Subsequently, free fatty acids (FFA), wax ester (WE), cholesteryl ester  
484 (ChE), squalene (SQ), squalene epoxide (squalene epoxide), squalene  
485 monohydroperoxidperipheral (SQOOH), DAG, and TAG were analyzed. As a result of  
486 the measurement, small amounts of lipids were found on the hands. Among them, fatty  
487 acids were relatively abundant, among which C16: 0, C14: 0, and C12: 0 were  
488 abundantly detected (Table 2). However, none had a significant positive correlation with  
489 the antimicrobial activity of hand surface components, and only a negative correlation  
490 with DAG. Lastly, antimicrobial proteins were analyzed using shotgun proteomics  
491 analysis, including dermcidin, prolactin-inducible protein (PIP), and lysozyme C,  
492 among which prolactin-inducible protein was significantly correlated with antimicrobial

493 activity.

494

495 **3.4. Verification of the effect of lactic acid application on the antimicrobial activity**  
496 **of hands**

497 Lactic acid is abundant on the hands and is highly correlated with the antimicrobial  
498 activity of the surface layer component. In fact, lactic acid has also been shown to have  
499 antimicrobial activity in test tube experiments [17]. However, these results are based on  
500 the evaluation of liquid contact, and it is unclear whether the amount of lactic acid in  
501 this study can enhance the levels of antimicrobial activity on hands. Therefore, based on  
502 the amount of lactic acid found for the 54 participants in this study (Figure 4A), a lactic  
503 acid solution was added to the hands of four subjects to verify whether it improved the  
504 antimicrobial activity. To reduce the contribution of natural lactic acid to the skin, the  
505 subjects washed their hands just before the experiment. Immediately after the hand  
506 washing, we confirmed that the amount of lactic acid on the hands was  $<30 \text{ nmoL/cm}^2$   
507 in each subject (Figure 4B). Although individual differences were observed in all four  
508 subjects, an improvement in antimicrobial activity was confirmed within the range of  
509 the amount of lactic acid on the hands, suggesting that lactic acid is important for hand  
510 antimicrobial activity. Furthermore, hydrochloric acid (HCl) solution with an equivalent

511 pH (pH = 2.24) to that of the maximum amount of lactic acid in Figure 4B (652  
512 mol/cm<sup>2</sup>) was applied to the hands of subjects S2 and S4. As a result, HCl was also  
513 found to improve the antimicrobial activity ( $P < 0.05$ ), although not as much as lactic  
514 acid ( $P < 0.05$ ) (Figure S4).

515

#### 516 **4. Discussion**

517 In this study, we developed a novel methodology to quantify and characterize the  
518 function of the surface infection barrier on the hands that inactivates bacteria and  
519 viruses. For the first time, we demonstrated that the infection barrier found on the  
520 surface of hands plays a crucial role in quantifying the risk of the transmission of  
521 infectious diseases. In addition, we identified a list of components found on the hand  
522 surface that was correlated with antimicrobial activity, and demonstrated that lactic acid  
523 is a key component of this infection barrier.

524 We confirmed the reliability of these methods by identifying a positive correlation  
525 between the *in vitro* and *in vivo* methods in which bacteria are applied to hands. The  
526 data suggest that surface components are associated with the antimicrobial activity of  
527 hands. However, the correlation coefficient value was not high ( $r = 0.66$ ,  $P = 0.1$ ),  
528 suggesting that the antimicrobial activity of hands is not only due to the surface

529 components but also to other factors, especially skin properties. such as pH and  
530 temperature [18].

531 Interestingly, in this study, despite exhibiting higher antimicrobial activity on the  
532 hands, the low morbidity group conducted hand washing and sanitizing less frequently  
533 than the high morbidity group. This may simply be due to a greater hygiene awareness  
534 in the high morbidity group, since these individuals are more susceptible to infection.  
535 Although there is no doubt that hand washing and sanitizing are effective for the  
536 instantaneous removal of pathogens [19], these actions cannot control the high  
537 frequency at which individuals unconsciously touch their face or potentially  
538 contaminated objects in their immediate environment. It is worth noting that the  
539 subjects in this study, who were part of the general public, appeared to have a lower  
540 hygiene awareness than medical professionals. This suggests that the inherent  
541 antimicrobial activity of hands plays a role in preventing infections *via* unconscious  
542 transmission.

543 In addition, our study showed that not only the antimicrobial activity on hands, but  
544 also oral mucosal moisture (and saliva volume) was associated with infection  
545 prevalence. Oral mucosal moisture is used as an objective indicator of the amount of  
546 saliva secretion [20], and a similar tendency was observed in the actual saliva volume.



547 Saliva exerts a protective function against infection and is known to be important in  
548 preventing attack by pathogens [21, 22]. The results of this study strongly suggest that  
549 not only the hands, but also the oral cavity, exert a first-line of defense against bacterial  
550 and viral infections, and thus are important for preventing infection. On the other hand,  
551 there was no significant difference in NK cell activity and nasal mucosa clearance  
552 between the low morbidity and high morbidity groups. Many studies have shown that  
553 these biological functions are important in the prevention of infectious diseases [23, 24].  
554 This study was conducted for subjects living with children under elementary school age,  
555 which is an environmental factor that greatly affects the prevalence of infectious  
556 diseases [25]. Limiting the attributes of the participants, the two groups in this study had  
557 similar lifestyles, such as commuting style, working style, sleep time, and stress level,  
558 among others. Thus, the population studied is unlikely to make a difference in the levels  
559 of NK cell activity and nasal mucosa clearance. The main limitation of this retrospective  
560 study is the small size of the study. Large-scale and prospective trials will be needed to  
561 better clarify the association between the antimicrobial activity of hands and morbidity.

562 Next, a comprehensive analysis was performed to identify the factors that control  
563 hand surface barrier activity. In previous study, sebum-containing components,  
564 especially fatty acids, on the skin were found to exhibit antimicrobial properties [29].

565 However, none had a significant positive correlation with the antimicrobial activity of  
566 the hands, and only a negative correlation with DAG. Compared with previous reports,  
567 the amount of lipid detected was very small, and since there are no sebaceous glands in  
568 the palm, it is highly likely that the lipids analyzed were mainly derived from sources  
569 other than the hands. On the other hand, prolactin-inducible protein was significantly  
570 correlated with antimicrobial activities among the water-soluble antimicrobial proteins,  
571 and was suggested to also be involved in the surface infection barrier of the hands.  
572 Furthermore, several amino acids were also found to be positively correlated, however,  
573 there are no prior report related to their antimicrobial properties, and the details  
574 underlying this action remain unknown.

575 Lactic acid is prominently present on hands. Although the hands do not have any  
576 sebaceous glands, there are many sweat glands ( $518/\text{cm}^2$ ) compared to other sites [26].  
577 In addition to lactic acid, several organic acids were also highly correlated with  
578 antimicrobial activity, which are known to exert antimicrobial activity [27]. In general,  
579 organic acids are non-dissociative and pass through the cell membrane of the bacterium,  
580 before becoming dissociated and releasing protons to damage the bacterium from within  
581 [28]. The antimicrobial properties of organic acids depend on their pH [17].  
582 Interestingly, almost all organic acids that exhibit a significant correlation with

583 antimicrobial activity are key metabolites of metabolic pathways (e.g. malic acid,  
584 fumaric acid, and citric acid). This suggests that, in addition to lowering the pH of the  
585 hands, their presence on the surface of hands may give rise to a metabolic environment  
586 that is not favorable for microbial proliferation. This is supported by the fact that lactic  
587 acid exhibits a higher antimicrobial activity than a HCl solution with a similar pH.

588 However, the application of lactic acid solutions raises several issues: (1) skin  
589 damage, since it is an alpha hydroxylic acid and a highly acidic solution [31]; (2)  
590 variations in the pH of the skin between individuals, ranging from 4.0 to 7.0, which  
591 would affect the efficacy of lactic acid against antimicrobial activity [30]; (3) unknown  
592 long-lasting antimicrobial effects. Therefore, a more complex formulation will need to  
593 be identified to solve these issues and enhance the antimicrobial properties of lactic acid  
594 for the development of a novel hand hygiene technology to reduce contact infection risk  
595 in daily life.

596

#### 597 **Authors' contributions**

598 All authors have read and approved the manuscript. YN, TM, and KM wrote the  
599 manuscript. YK and AH conducted a clinical survey to analyze the relationship between  
600 high morbidity and low morbidity to infection. KN performed the investigations related

601 to analyzing hand surface components. YN, YO, and IM designed and executed other  
602 experiments and analyzed the data. TM and KM supervised the study and reviewed the  
603 results.

#### 604 **Conflicts of interest**

605 All authors are employees of the study sponsor, Kao Corporation, Tokyo, Japan.

#### 606 **Ethical approval**

607 The study protocol, including sample collection, was reviewed, and approved by the  
608 Ethical Committee of the Kao Corporation. (1) and (4) were approved as S311-200807,  
609 (2) was approved as T116-18032, and (3) was approved as S108-171024. Informed  
610 written consent was obtained from all research participants after the procedures had  
611 been explained with documentation. All experiments were conducted according to the  
612 principles of the Declaration of Helsinki.

#### 613 **Funding**

614 This study was funded by Kao Corporation, Tokyo, Japan. The Kao Corporation played  
615 a role in the design of the study, the collection, analysis, and interpretation of data, and  
616 the writing of the manuscript.

#### 617 **Acknowledgements**

618 The authors would like to thank Yuuki Yanagisawa (Kao Corp.) for their useful  
619 comments and discussions throughout the research. We also thank Akira Fuji (Kao  
620 Corp.) for their valuable discussions. This study was performed in collaboration with  
621 Chihiro Tamoto (Kao Corp.), Kaori Hayashi (Kao Corp.), Yuki Sakamoto (Kao Corp.),  
622 Toshiya Morikawa (Kao Corp.), and Yukihiisa Hashimoto (Kao Corp.). Editorial  
623 support, in the form of medical writing, assembling tables, and creating high-resolution  
624 images based on authors' detailed directions, collating author comments, copyediting,  
625 fact-checking, and referencing, was provided by Editage.

626 **References**

- 627 1. Luby, S.P., et al., *Effect of handwashing on child health: a randomised*  
628 *controlled trial*. Lancet, 2005. **366**(9481): p. 225-33.
- 629 2. Kwok, Y.L., J. Gralton, and M.L. McLaws, *Face touching: a frequent habit that*  
630 *has implications for hand hygiene*. Am J Infect Control, 2015. **43**(2): p. 112-4.
- 631 3. Shiraly, R., Z. Shayan, and M.L. McLaws, *Face touching in the time of*  
632 *COVID-19 in Shiraz, Iran*. Am J Infect Control, 2020.
- 633 4. Bean, B., et al., *Survival of influenza viruses on environmental surfaces*. J Infect  
634 Dis, 1982. **146**(1): p. 47-51.
- 635 5. van Doremalen, N., et al., *Aerosol and Surface Stability of SARS-CoV-2 as*  
636 *Compared with SARS-CoV-1*. N Engl J Med, 2020. **382**(16): p. 1564-1567.
- 637 6. White, C.G., et al., *Reduction of illness absenteeism in elementary schools using*  
638 *an alcohol-free instant hand sanitizer*. J Sch Nurs, 2001. **17**(5): p. 258-65.
- 639 7. Aiello, A.E. and E. Larson, *Antibacterial cleaning and hygiene products as an*  
640 *emerging risk factor for antibiotic resistance in the community*. Lancet Infect Dis,  
641 2003. **3**(8): p. 501-6.
- 642 8. Lingaas, E. and M. Fagernes, *Development of a method to measure bacterial*  
643 *transfer from hands*. J Hosp Infect, 2009. **72**(1): p. 43-9.

- 644 9. Schaubert, J. and R.L. Gallo, *Antimicrobial peptides and the skin immune defense*  
645 *system*. J Allergy Clin Immunol, 2009. **124**(3 Suppl 2): p. R13-8.
- 646 10. Turner, R.B., et al., *Efficacy of organic acids in hand cleansers for prevention of*  
647 *rhinovirus infections*. Antimicrob Agents Chemother, 2004. **48**(7): p. 2595-8.
- 648 11. Iketani, R., et al., *The Effect of Tea Catechins on Natural Killer Cell Activity in*  
649 *the Elderly: A Pilot Study*. Clinical Pharmacology, 2019. **50**(4): p. 139-145.
- 650 12. Ito, J.T., et al., *Nasal Mucociliary Clearance in Subjects With COPD After*  
651 *Smoking Cessation*. Respir Care, 2015. **60**(3): p. 399-405.
- 652 13. Ishii, S., et al., *Identification of the Catechin Uptake Transporter Responsible*  
653 *for Intestinal Absorption of Epigallocatechin Gallate in Mice*. Sci Rep, 2019.  
654 **9**(1): p. 11014.
- 655 14. Ishihama, Y., et al., *Exponentially modified protein abundance index (emPAI) for*  
656 *estimation of absolute protein amount in proteomics by the number of sequenced*  
657 *peptides per protein*. Mol Cell Proteomics, 2005. **4**(9): p. 1265-72.
- 658 15. Han, X., K. Yang, and R.W. Gross, *Multi-dimensional mass spectrometry-based*  
659 *shotgun lipidomics and novel strategies for lipidomic analyses*. Mass Spectrom  
660 Rev, 2012. **31**(1): p. 134-78.
- 661 16. Fukui, S., et al., *A mild hand cleanser, alkyl ether sulphate supplemented with*

- 662            *alkyl ether carboxylic acid and alkyl glucoside, improves eczema on the hand*  
663            *and prevents the growth of Staphylococcus aureus on the skin surface.* Int J  
664            Cosmet Sci, 2016. **38**(6): p. 599-606.
- 665    17.    Kim, S.A. and M.S. Rhee, *Marked synergistic bactericidal effects and mode of*  
666            *action of medium-chain fatty acids in combination with organic acids against*  
667            *Escherichia coli O157:H7.* Appl Environ Microbiol, 2013. **79**(21): p. 6552-60.
- 668    18.    Maliyar, K., R. Persaud-Jaimangal, and R.G. Sibbald, *Associations Among Skin*  
669            *Surface pH, Temperature, and Bacterial Burden in Wounds.* Adv Skin Wound  
670            Care, 2020. **33**(4): p. 180-185.
- 671    19.    Aiello, A.E., et al., *Effect of hand hygiene on infectious disease risk in the*  
672            *community setting: a meta-analysis.* Am J Public Health, 2008. **98**(8): p.  
673            1372-81.
- 674    20.    Takahashi, F., T. Koji, and O. Morita, *The Usefulness of an Oral Moisture*  
675            *Checking Device (Moisture Checker for Mucus<sup>R</sup>).* Nihon Hotetsu Shika Gakkai  
676            Zasshi, 2005. **49**(2): p. 283-289.
- 677    21.    Heo, S.M., et al., *Host defense proteins derived from human saliva bind to*  
678            *Staphylococcus aureus.* Infect Immun, 2013. **81**(4): p. 1364-73.
- 679    22.    Limsuwat, N., et al., *Sialic acid content in human saliva and anti-influenza*



- 680            *activity against human and avian influenza viruses*. Arch Virol, 2016. **161**(3): p.
- 681            649-56.
- 682    23.    Wilson, R., et al., *Upper respiratory tract viral infection and mucociliary*
- 683            *clearance*. Eur J Respir Dis, 1987. **70**(5): p. 272-9.
- 684    24.    Hazeldine, J. and J.M. Lord, *The impact of ageing on natural killer cell function*
- 685            *and potential consequences for health in older adults*. Ageing Res Rev, 2013.
- 686            **12**(4): p. 1069-78.
- 687    25.    Sakurai, R., et al., *Long-term effects of an intergenerational program on*
- 688            *functional capacity in older adults: Results from a seven-year follow-up of the*
- 689            *REPRINTS study*. Arch Gerontol Geriatr, 2016. **64**: p. 13-20.
- 690    26.    Taylor, N.A. and C.A. Machado-Moreira, *Regional variations in transepidermal*
- 691            *water loss, eccrine sweat gland density, sweat secretion rates and electrolyte*
- 692            *composition in resting and exercising humans*. Extrem Physiol Med, 2013. **2**(1):
- 693            p. 4.
- 694    27.    Brul, S. and P. Coote, *Preservative agents in foods. Mode of action and*
- 695            *microbial resistance mechanisms*. Int J Food Microbiol, 1999. **50**(1-2): p. 1-17.
- 696    28.    Mani-López, E., H.S. García, and A. López-Malo, *Organic acids as*
- 697            *antimicrobials to control Salmonella in meat and poultry products*. Food

- 698            Research International, 2012. **45**(2): p. 713-721.
- 699    29.    Takigawa, H., et al., *Deficient production of hexadecenoic acid in the skin is*  
700            *associated in part with the vulnerability of atopic dermatitis patients to*  
701            *colonization by Staphylococcus aureus*. *Dermatology*, 2005. **211**(3): p. 240-8.
- 702    30.    Lambers, H., et al., *Natural skin surface pH is on average below 5, which is*  
703            *beneficial for its resident flora*. *Int J Cosmet Sci*, 2006. **28**(5): p. 359-70.
- 704    31.    Tang, S.C. and J.H. Yang, *Dual Effects of Alpha-Hydroxy Acids on the Skin*.  
705            *Molecules*, 2018. **23**(4).
- 706
- 707

708 **Figures**

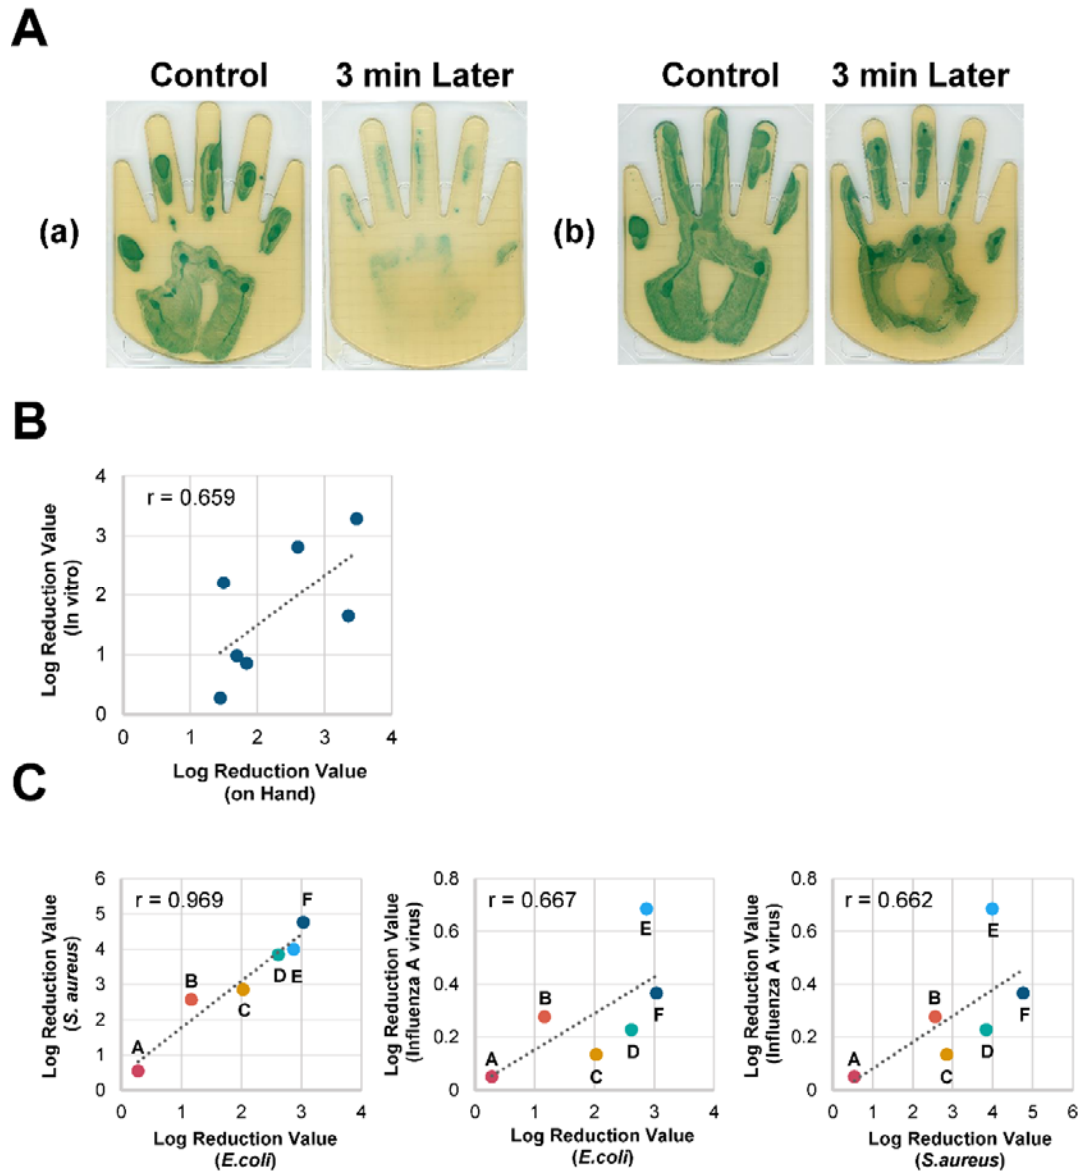

709

710 **Figure 1. Individual differences in hand antimicrobial activity and the importance**

711 **of surface components.**

712

713

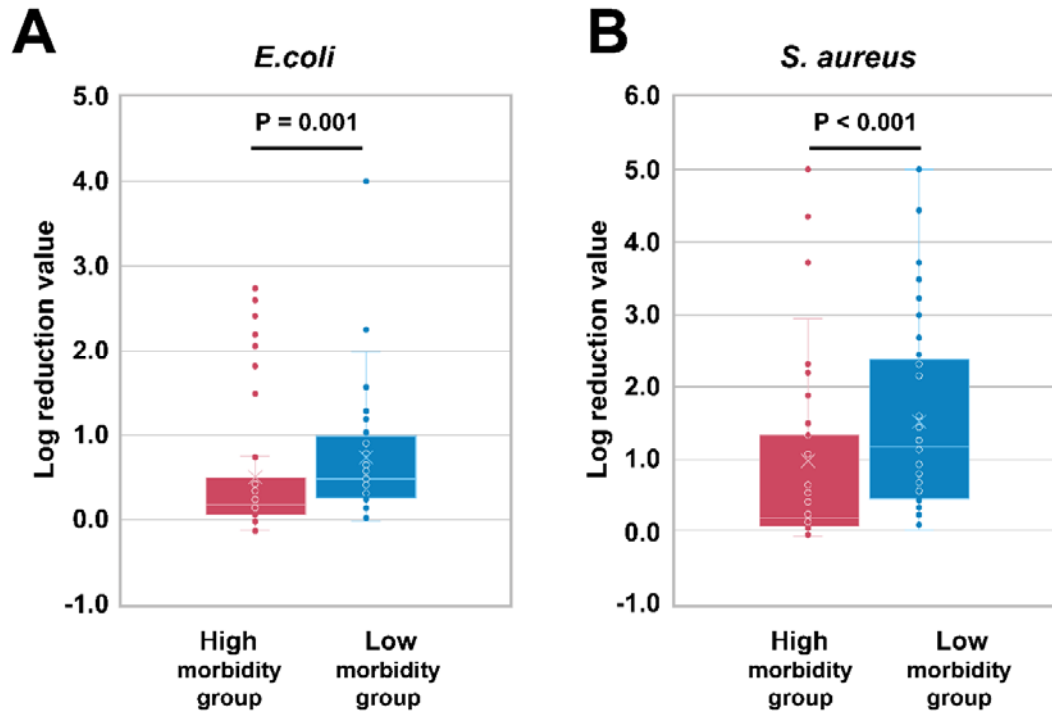

714

715 **Figure 2. Relationship between antimicrobial activity and morbidity to infection.**

716

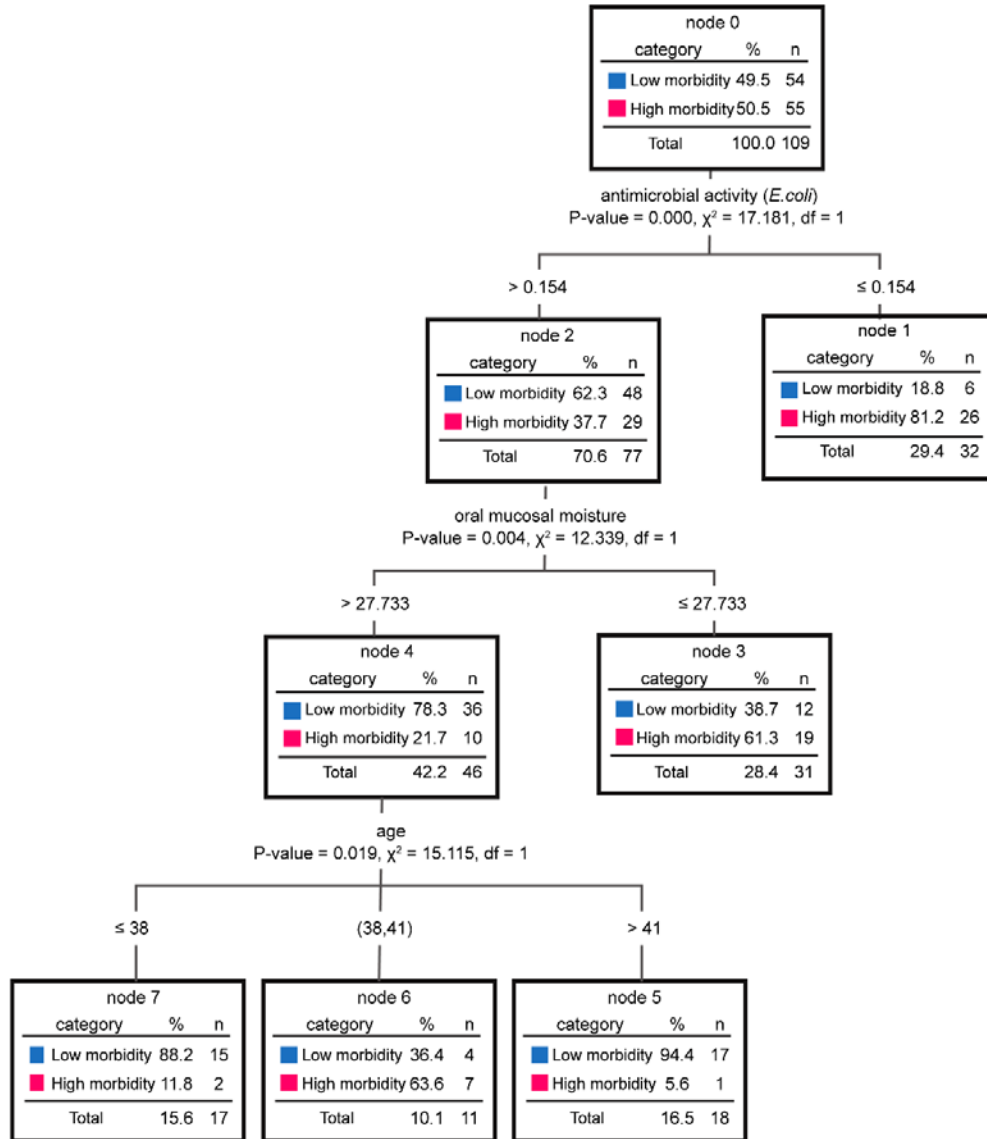

717

718 **Figure 3. Decision tree analysis to assess the biological parameters and**

719 **physiological functions.**

720

721

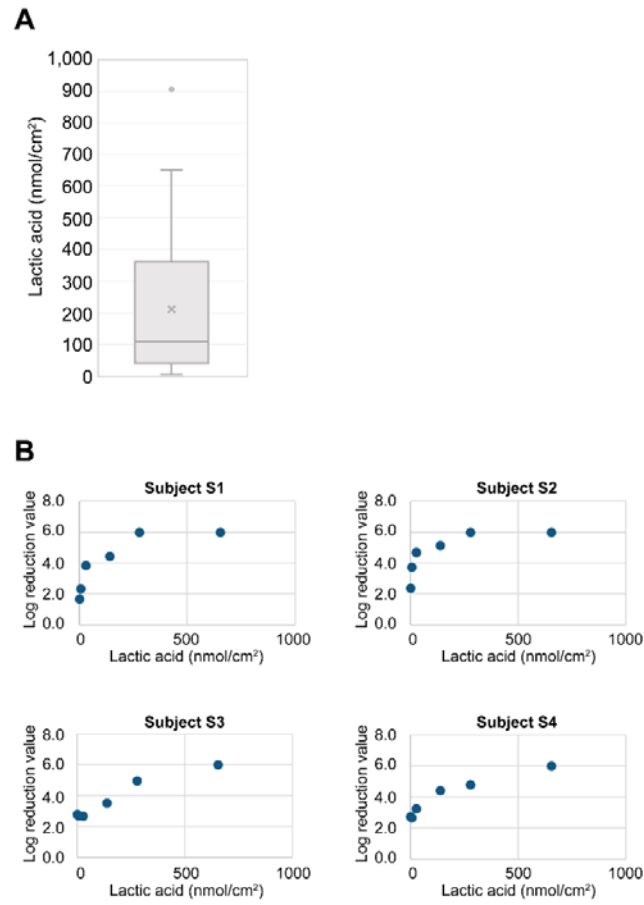

722

723 **Figure 4. Verification of the effect of lactic acid application on the antimicrobial**

724 **activity of hands.**

725 **Tables**

726

727 **Table 1. Physiological functions in a retrospective study investigating the relationship between the antimicrobial activity of**

728 **hands and morbidity to infection.** The data were first tested for normality using the Shapiro-Wilk test. Data showing normality were

729 assessed for variability by f-test and t-test, in accordance with variability. Data that did not show normality were tested with the

730 Mann-Whitney U test.

|                           | Low morbidity group |      |     | High morbidity group |      |     | <i>p</i> -value <sup>2</sup> |
|---------------------------|---------------------|------|-----|----------------------|------|-----|------------------------------|
|                           | n <sup>1</sup>      | Mean | SD  | n <sup>1</sup>       | Mean | SD  |                              |
| body temperature (°C)     | 54                  | 37.0 | 0.3 | 55                   | 37.0 | 0.3 | 0.666                        |
| saliva volume (g)         | 54                  | 2.4  | 1.5 | 55                   | 2    | 1.4 | 0.153                        |
| oral mucosal moisture (%) | 54                  | 30   | 3.3 | 55                   | 27.8 | 4.4 | 0.006                        |

|                                                |    |      |      |    |      |     |         |
|------------------------------------------------|----|------|------|----|------|-----|---------|
| NK cells activity in PBMCs (%)                 | 54 | 49.2 | 18.4 | 55 | 50.7 | 18  | 0.756   |
| nasal mucociliary clearance (sec.)             | 48 | 700  | 339  | 42 | 638  | 307 | 0.371   |
| Antimicrobial activity of hand (log reduction) |    |      |      |    |      |     |         |
| for <i>E. coli</i>                             | 54 | 0.7  | 0.8  | 55 | 0.5  | 0.7 | 0.001   |
| for <i>S.aureus</i>                            | 54 | 1.5  | 1.3  | 55 | 0.9  | 1.5 | < 0.001 |

731 <sup>1</sup>Parameters for which the number of samples is lower than all subjects indicate the parameters for which the corresponding number of  
 732 samples was not determined.

733 <sup>2</sup>P-values were calculated using Mann-Whitney U test.



**Table 2. Relationship between hand surface components and antimicrobial activity.**

|                                      | Components <sup>3</sup>     | Value <sup>1</sup> |               |               | Correlation coefficient <sup>2</sup> |                 |                          | p-value <sup>2</sup> |                 |                          |
|--------------------------------------|-----------------------------|--------------------|---------------|---------------|--------------------------------------|-----------------|--------------------------|----------------------|-----------------|--------------------------|
|                                      |                             | Maximum            | Minimum       | Mean          | <i>E.coli</i>                        | <i>S.aureus</i> | <i>Influenza A Virus</i> | <i>E.coli</i>        | <i>S.aureus</i> | <i>Influenza A Virus</i> |
| organic acid (nmol/cm <sup>2</sup> ) | <b>Lactic_acid</b>          | <b>906</b>         | <b>6</b>      | <b>212</b>    | <b>0.5561</b>                        | <b>0.6836</b>   | <b>0.6689</b>            | <b>0.000</b>         | <b>0.000</b>    | <b>0.000</b>             |
|                                      | Urocanic_acid               | 14.90              | 0.17          | 3.25          | <b>0.3080</b>                        | 0.2514          | 0.1816                   | 0.023                | 0.067           | 0.189                    |
|                                      | <b>Malic_acid</b>           | <b>1.308</b>       | <b>0.150</b>  | <b>0.585</b>  | <b>0.5834</b>                        | <b>0.6339</b>   | <b>0.6272</b>            | <b>0.000</b>         | <b>0.000</b>    | <b>0.000</b>             |
|                                      | Asparagine                  | 1.710              | 0.062         | 0.570         | 0.0487                               | 0.0611          | 0.1931                   | 0.726                | 0.661           | 0.162                    |
|                                      | <b>2-hydroxybutyricacid</b> | <b>0.223</b>       | <b>0.029</b>  | <b>0.116</b>  | <b>0.5170</b>                        | <b>0.6253</b>   | <b>0.6325</b>            | <b>0.000</b>         | <b>0.000</b>    | <b>0.000</b>             |
|                                      | Glycolic_acid               | 0.2140             | 0.0144        | 0.0652        | 0.0841                               | -0.0392         | -0.0738                  | 0.545                | 0.778           | 0.596                    |
|                                      | <b>Citric_acid</b>          | <b>0.2138</b>      | <b>0.0027</b> | <b>0.0487</b> | <b>0.5335</b>                        | <b>0.5568</b>   | <b>0.5353</b>            | <b>0.000</b>         | <b>0.000</b>    | <b>0.000</b>             |
|                                      | <b>Ascorbic_acid</b>        | <b>0.1167</b>      | <b>0.0000</b> | <b>0.0270</b> | <b>0.5750</b>                        | <b>0.6948</b>   | <b>0.6946</b>            | <b>0.000</b>         | <b>0.000</b>    | <b>0.000</b>             |
|                                      | <b>Azelaic_acid</b>         | <b>0.1136</b>      | <b>0.0023</b> | <b>0.0203</b> | <b>0.4100</b>                        | <b>0.3013</b>   | <b>0.3391</b>            | <b>0.002</b>         | <b>0.027</b>    | <b>0.012</b>             |
|                                      | <b>2-oxoglutarate</b>       | <b>0.0698</b>      | <b>0.0000</b> | <b>0.0202</b> | <b>0.5981</b>                        | <b>0.7455</b>   | <b>0.7537</b>            | <b>0.000</b>         | <b>0.000</b>    | <b>0.000</b>             |
|                                      | <b>Suberic_acid</b>         | <b>0.0426</b>      | <b>0.0016</b> | <b>0.0127</b> | <b>0.3889</b>                        | <b>0.2933</b>   | <b>0.3232</b>            | <b>0.004</b>         | <b>0.031</b>    | <b>0.017</b>             |
|                                      | Succinic_acid               | 0.1403             | 0.0006        | 0.0113        | -0.0095                              | 0.1295          | 0.0238                   | 0.946                | 0.351           | 0.864                    |
|                                      | <b>Fumaric_acid</b>         | <b>0.0375</b>      | <b>0.0000</b> | <b>0.0105</b> | <b>0.5234</b>                        | <b>0.7057</b>   | <b>0.6669</b>            | <b>0.000</b>         | <b>0.000</b>    | <b>0.000</b>             |
|                                      | Sebacic_acid                | 0.01209            | 0.00008       | 0.00161       | 0.1328                               | 0.2002          | 0.1262                   | 0.339                | 0.147           | 0.363                    |
| amino acid (nmol/cm <sup>2</sup> )   | Pyridoxine                  | 0.024862           | 0.000000      | 0.000845      | -0.0890                              | -0.0661         | -0.0938                  | 0.522                | 0.635           | 0.500                    |
|                                      | Nicotinic_acid              | 0.002420           | 0.000000      | 0.000257      | 0.0638                               | 0.0492          | 0.0635                   | 0.647                | 0.724           | 0.648                    |
|                                      | Panthothenic_acid           | 0.0019567          | 0.0000000     | 0.0000642     | -0.0262                              | -0.0580         | -0.0776                  | 0.851                | 0.677           | 0.577                    |
|                                      | Serine                      | 53                 | 1             | 18            | 0.2210                               | 0.2003          | 0.1883                   | 0.108                | 0.146           | 0.173                    |
|                                      | Glycine                     | 33                 | 1             | 12            | 0.2161                               | 0.1950          | 0.2063                   | 0.117                | 0.158           | 0.134                    |

|  |                   |              |              |              |               |                |                |              |              |              |
|--|-------------------|--------------|--------------|--------------|---------------|----------------|----------------|--------------|--------------|--------------|
|  | Ornithine         | 14.4         | 0.1          | 3.4          | -0.1398       | <b>-0.2774</b> | -0.2370        | 0.314        | 0.042        | 0.084        |
|  | <b>Alanine</b>    | <b>11.2</b>  | <b>0.3</b>   | <b>4.2</b>   | <b>0.3305</b> | <b>0.3134</b>  | <b>0.2961</b>  | <b>0.015</b> | <b>0.021</b> | <b>0.030</b> |
|  | Threonine         | 8.3          | 0.3          | 3.1          | 0.1930        | 0.1564         | 0.1532         | 0.162        | 0.259        | 0.269        |
|  | Valine            | 7.7          | 0.1          | 1.8          | 0.1422        | 0.0986         | 0.1655         | 0.305        | 0.478        | 0.232        |
|  | Aspartic_acid     | 7.5          | 0.2          | 2.3          | 0.1044        | 0.0872         | 0.1288         | 0.452        | 0.531        | 0.353        |
|  | Pyroglutamic_acid | 5.7          | 0.5          | 2.6          | 0.2458        | 0.2263         | 0.2500         | 0.073        | 0.100        | 0.068        |
|  | Histidine         | 5.4          | 0.1          | 1.4          | -0.0442       | -0.1346        | -0.1292        | 0.751        | 0.332        | 0.352        |
|  | Proline           | 4.3          | 0.2          | 1.7          | 0.0711        | -0.0097        | 0.0188         | 0.609        | 0.945        | 0.893        |
|  | Leucine           | 3.8          | 0.1          | 1.5          | 0.2086        | 0.1871         | 0.2667         | 0.130        | 0.175        | 0.051        |
|  | Arginine          | 2.88         | 0.03         | 0.22         | 0.1072        | 0.0915         | 0.0976         | 0.441        | 0.511        | 0.482        |
|  | Isoleucine        | 2.7          | 0.1          | 1.4          | 0.2340        | 0.2241         | <b>0.2921</b>  | 0.089        | 0.103        | 0.032        |
|  | Lysine            | 2.47         | 0.07         | 0.80         | -0.0441       | -0.1526        | -0.1133        | 0.751        | 0.271        | 0.415        |
|  | Tyrosine          | 2.38         | 0.02         | 0.86         | 0.1571        | 0.1038         | 0.1342         | 0.257        | 0.455        | 0.333        |
|  | Phenylalanine     | 2.07         | 0.03         | 0.79         | 0.1926        | 0.1703         | 0.2416         | 0.163        | 0.218        | 0.078        |
|  | Glutamic_acid     | 1.43         | 0.07         | 0.50         | 0.1637        | 0.1392         | 0.1938         | 0.237        | 0.316        | 0.160        |
|  | Citrulline        | 1.26         | 0.00         | 0.13         | 0.0808        | 0.0029         | -0.0742        | 0.561        | 0.984        | 0.594        |
|  | <b>Creatinine</b> | <b>0.68</b>  | <b>0.03</b>  | <b>0.21</b>  | <b>0.4436</b> | <b>0.5107</b>  | <b>0.4907</b>  | <b>0.001</b> | <b>0.000</b> | <b>0.000</b> |
|  | Tryptophan        | 0.62         | 0.01         | 0.19         | <b>0.2870</b> | 0.2385         | 0.2443         | 0.035        | 0.082        | 0.075        |
|  | <b>Taurine</b>    | <b>0.54</b>  | <b>0.02</b>  | <b>0.17</b>  | <b>0.4780</b> | <b>0.5491</b>  | <b>0.4796</b>  | <b>0.000</b> | <b>0.000</b> | <b>0.000</b> |
|  | Methionine        | 0.47         | 0.01         | 0.15         | 0.2076        | 0.1733         | <b>0.3055</b>  | 0.132        | 0.210        | 0.025        |
|  | <b>Choline</b>    | <b>0.274</b> | <b>0.014</b> | <b>0.092</b> | <b>0.3986</b> | <b>0.4507</b>  | <b>0.4518</b>  | <b>0.003</b> | <b>0.001</b> | <b>0.001</b> |
|  | Uric_acid         | 0.094        | 0.000        | 0.022        | -0.1869       | <b>-0.3912</b> | <b>-0.4526</b> | 0.176        | 0.003        | 0.001        |

|                                     |                            |                 |                 |                 |                |                |                |              |              |              |
|-------------------------------------|----------------------------|-----------------|-----------------|-----------------|----------------|----------------|----------------|--------------|--------------|--------------|
|                                     | Xanthine                   | 0.083           | 0.001           | 0.031           | 0.1577         | 0.2513         | <b>0.2818</b>  | 0.255        | 0.067        | 0.039        |
|                                     | <b>Creatine</b>            | <b>0.060</b>    | <b>0.002</b>    | <b>0.026</b>    | <b>0.4442</b>  | <b>0.4391</b>  | <b>0.4126</b>  | <b>0.001</b> | <b>0.001</b> | <b>0.002</b> |
|                                     | Cystine                    | 0.0190          | 0.0002          | 0.0058          | 0.2032         | 0.1808         | 0.2010         | 0.141        | 0.191        | 0.145        |
|                                     | <b>Carnitine</b>           | <b>0.0145</b>   | <b>0.0009</b>   | <b>0.0058</b>   | <b>0.4661</b>  | <b>0.4594</b>  | <b>0.4257</b>  | <b>0.000</b> | <b>0.000</b> | <b>0.001</b> |
|                                     | Tyramine                   | 0.01071         | 0.00000         | 0.00062         | 0.1585         | 0.0731         | 0.2147         | 0.252        | 0.599        | 0.119        |
|                                     | Inosine                    | 0.000397        | 0.000000        | 0.000028        | -0.0376        | -0.1101        | -0.1011        | 0.787        | 0.428        | 0.467        |
|                                     | <b>p-Aminobenzoic_acid</b> | <b>0.000397</b> | <b>0.000000</b> | <b>0.000074</b> | <b>0.4637</b>  | <b>0.3999</b>  | <b>0.3039</b>  | <b>0.000</b> | <b>0.003</b> | <b>0.025</b> |
| lipid ( $\mu\text{g}/\text{cm}^2$ ) | FFA[C14:0]                 | 1.01            | 0.00            | 0.06            | -0.1633        | -0.1392        | -0.0382        | 0.238        | 0.316        | 0.784        |
|                                     | TAG                        | 0.34            | 0.00            | 0.05            | -0.1961        | -0.1308        | -0.2086        | 0.155        | 0.346        | 0.130        |
|                                     | FFA[C12:0]                 | 0.23            | 0.01            | 0.04            | -0.2586        | -0.2410        | -0.1374        | 0.059        | 0.079        | 0.322        |
|                                     | FFA[C16:0]                 | 0.20            | 0.02            | 0.07            | -0.1985        | -0.1849        | -0.1729        | 0.150        | 0.181        | 0.211        |
|                                     | SQ                         | 0.18            | 0.01            | 0.04            | -0.0874        | -0.0706        | -0.0919        | 0.530        | 0.612        | 0.509        |
|                                     | FFA[C18:0]                 | 0.15            | 0.01            | 0.03            | <b>-0.2934</b> | <b>-0.3120</b> | -0.2542        | 0.031        | 0.022        | 0.064        |
|                                     | FFA[C18:1]                 | 0.10            | 0.00            | 0.02            | 0.0688         | -0.0405        | 0.0740         | 0.621        | 0.771        | 0.595        |
|                                     | WE                         | 0.10            | 0.00            | 0.01            | -0.2548        | -0.2342        | -0.2209        | 0.063        | 0.088        | 0.109        |
|                                     | FFA[C16:1]                 | 0.06            | 0.00            | 0.01            | 0.0188         | -0.1093        | -0.0826        | 0.893        | 0.432        | 0.553        |
|                                     | SQepo                      | 0.05            | 0.00            | 0.01            | -0.0573        | 0.0238         | -0.0126        | 0.681        | 0.864        | 0.928        |
|                                     | FFA[C15:0]                 | 0.03            | 0.00            | 0.01            | -0.0093        | -0.1336        | -0.1445        | 0.947        | 0.335        | 0.297        |
|                                     | <b>DAG</b>                 | <b>0.030</b>    | <b>0.000</b>    | <b>0.004</b>    | <b>-0.2956</b> | <b>-0.3269</b> | <b>-0.3575</b> | <b>0.030</b> | <b>0.016</b> | <b>0.008</b> |
|                                     | ChE                        | 0.020           | 0.000           | 0.005           | 0.0221         | 0.0224         | 0.0261         | 0.874        | 0.872        | 0.851        |
|                                     | SQOOH                      | 0.010           | 0.000           | 0.001           | -0.0947        | -0.0545        | -0.2466        | 0.496        | 0.695        | 0.072        |
| protein (emPAI)                     | Dermeidin                  | 113             | 1               | 28              | 0.2139         | <b>0.3793</b>  | <b>0.3379</b>  | 0.120        | 0.005        | 0.012        |

|  |                                    |            |            |            |               |               |               |              |              |              |
|--|------------------------------------|------------|------------|------------|---------------|---------------|---------------|--------------|--------------|--------------|
|  | <b>Prolactin-inducible protein</b> | <b>4.2</b> | <b>0.0</b> | <b>1.4</b> | <b>0.3179</b> | <b>0.3862</b> | <b>0.3093</b> | <b>0.019</b> | <b>0.004</b> | <b>0.023</b> |
|  | Lysozyme C                         | 1.5        | 0.0        | 0.3        | -0.0090       | -0.0957       | -0.1007       | 0.948        | 0.491        | 0.469        |

735 <sup>1</sup>The numbers correspond to the amounts that exist on the hand surface and are arranged in order of average value.

736 <sup>2</sup>Correlation and P-value between each compound and antimicrobial activity was calculated using Holm-corrected Pearson correlation

737 coefficients. Bold numbers show statistically significant differences (P-value less than 0.05).

738 <sup>3</sup>Bold indicates the compounds that were significantly correlated with all antibacterial and antiviral activities.

739 **Figures Legends**

740

741 **Figure 1. Individual differences in hand antimicrobial activity and the**  
742 **importance of surface components. A: Qualitative comparison results using agar**  
743 **medium for (a) hands with high antimicrobial activity and (b) hands with low**  
744 **antimicrobial activity.** Results for 30 s (control) and 3 min after applying *E. coli* (OD =  
745 0.2) to the hand. **B: Correlation between the antimicrobial activity of the hands (*in***  
746 ***vivo*) and the antimicrobial activity of the surface components of the hands (*in***  
747 ***vitro*).** The antimicrobial activity of the hands was measured by applying an *E. coli*  
748 solution (OD = 0.2) and swabbing after 3 min. The surface components of the hands  
749 were collected with a cotton swab, extracted with ethanol, mixed with an equal amount  
750 of *E. coli*, and concentrated to 0.8  $\mu\text{L}/\text{cm}^2$ . The antimicrobial activity was measured by  
751 mixing the sample and an equal amount of *E. coli* (OD = 0.02) and reacting for 30 min.  
752 The log reduction value denotes the relative logarithmic reduction of viable bacteria.  
753 The value of Pearson's correlation coefficient is indicated in the graph. **C: Correlation**  
754 **of the antimicrobial activity of the surface components of the hands against *E. coli*,**  
755 ***S. aureus*, and influenza A virus.** Symbols with the same color indicate individual  
756 participants between the three graphs. *E. coli*, *S. aureus*, and influenza A virus were

757 evaluated using undiluted samples, 8-fold diluted samples, and 100-fold diluted samples,  
758 respectively, due to the toxicity of DMSO. The log reduction value denotes the relative  
759 logarithmic reduction of the bacterial or viral number. The value of Pearson's  
760 correlation coefficient is indicated in each graph.

761

762 **Figure 2. Relationship between antimicrobial activity and morbidity to infection.**

763 Result of antimicrobial activity against *E. coli* and *S. aureus*. Left (red) and right (blue)  
764 denotes the high morbidity group (N=55) and the low morbidity group (N=54),  
765 respectively. Antimicrobial activity was measured using an *in vitro* method, where the  
766 log reduction value denotes the relative logarithmic reduction of viable bacteria.  
767 Comparison between the groups was performed using the Mann-Whitney U test.

768

769 **Figure 3. Decision tree analysis to assess the biological parameters and**

770 **physiological functions.** The biological parameters (age, sex, and body temperature)  
771 and physiological functions (antimicrobial activity of hand, saliva volume, oral mucosal  
772 moisture, NK cells activity in PBMCs, and nasal mucociliary clearance) were used.  
773 Odds ratio (ORs) and a 95% confidence interval were obtained from the  
774 cross-tabulation method.

775

776 **Figure 4. Verification of the effect of lactic acid application on the antimicrobial**

777 **activity of hands.** A: Amount of lactic acid on the surface of the hands of the

778 participants (N = 54). B: Bactericidal effect of applying lactic acid onto the hands of the

779 participants. The test site was 2 × 2 cm on the palm. After hand washing, lactic acid

780 aqueous solution was added the test site, followed by drying for 5 min. Then, 10 µl of

781 the bacterial solution (*E. coli*, OD = 1) was added to the test site, spread for 30 s,

782 followed by drying for 3 min. The log reduction value denotes the relative logarithmic

783 reduction of viable bacteria.
